# Supplementary material for: Thermal vacuum de-oxygenation and post oxidation of TiO2 nanorod arrays for enhanced photoelectrochemical properties
Source: Royal Society of Chemistry journal article supplement (doi:10.1039/c8ta11830b), 2019-01-01
Supplement: c8ta11830b1.pdf [file c8ta11830b1.pdf]

Electronic Supplementary Information (ESI)

**Thermal Vacuum De-oxygen and Post Oxidation of TiO<sub>2</sub> Nanorod  
Arrays for Enhanced Potoelectrochemical Properties**

*Chao Huang,<sup>a,b,‡</sup> Juncao Bian,<sup>a,b,‡</sup> Yao Guo,<sup>a,b</sup> Miaoyan Huang,<sup>a,b</sup> Rui-Qin Zhang<sup>a,b,c\*</sup>*

<sup>a</sup> Department of Physics, City University of Hong Kong, Hong Kong SAR, China

<sup>b</sup> Shenzhen Research Institute, City University of Hong Kong, Shenzhen, China

<sup>c</sup> Beijing Computational Science Research Center, Beijing 100193, China

<sup>‡</sup> These authors contribute equally to this work.

\* Corresponding author; E-mail: [aprqz@cityu.edu.hk](mailto:aprqz@cityu.edu.hk)

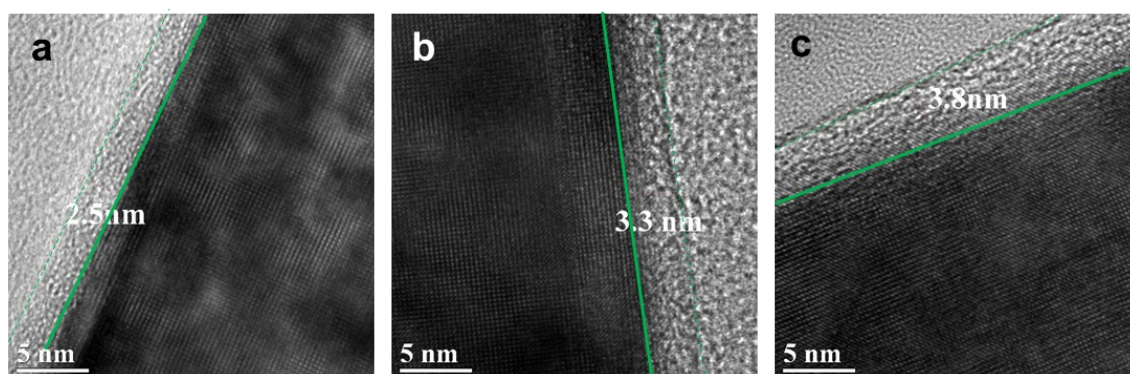

**Fig. S1** SEM images of  $\text{TiO}_{2-x}$ -15,  $\text{TiO}_{2-x}$ -30, and  $\text{TiO}_{2-x}$ -60 NRAs.

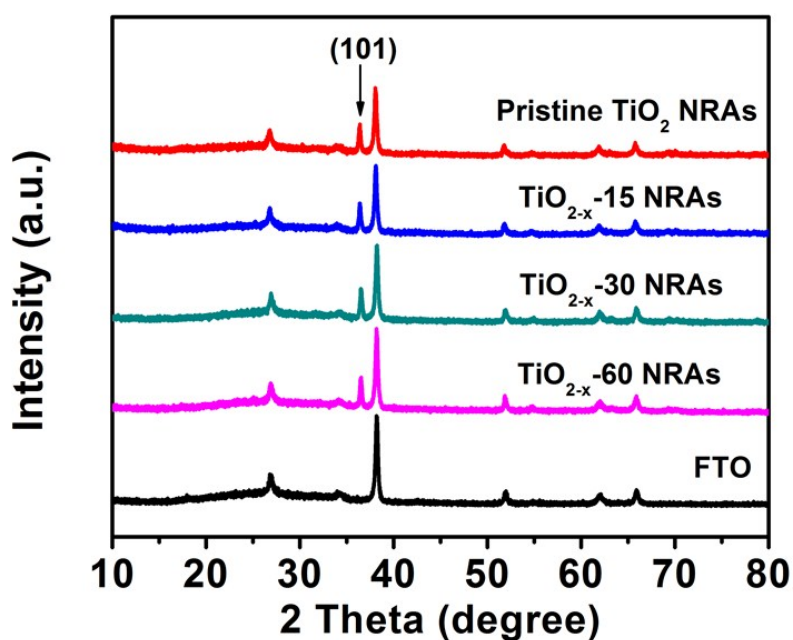

**Fig. S2** XRD patterns of FTO, pristine  $\text{TiO}_2$  NRAs, and  $\text{TiO}_{2-x}$ -15,  $\text{TiO}_{2-x}$ -30, and  $\text{TiO}_{2-x}$ -60 NRAs.

Fig. S2 displays the XRD patterns of the pristine  $\text{TiO}_2$  NRAs,  $\text{TiO}_{2-x}$ -15,  $\text{TiO}_{2-x}$ -30,  $\text{TiO}_{2-x}$ -60 NRAs, and bare FTO, respectively. Comparing with FTO, one more peak can be found at the two theta degree of 36.1, attributing to the (101) plane of rutile  $\text{TiO}_2$  (JCPDS No.21-1276). As it can be seen, no obvious phase transformation occurred after the thermal treatment in vacuum.

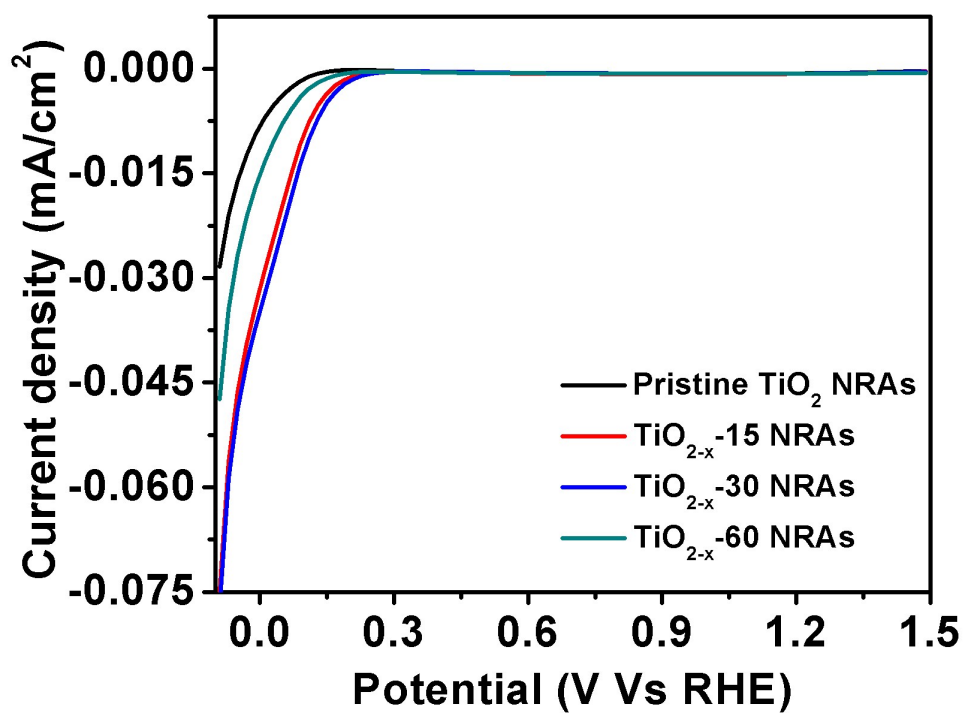

Fig. S3 LSV curves of pristine TiO<sub>2</sub> NRAs, and TiO<sub>2-x</sub>-15, TiO<sub>2-x</sub>-30, and TiO<sub>2-x</sub>-60 NRAs. (without light illumination)

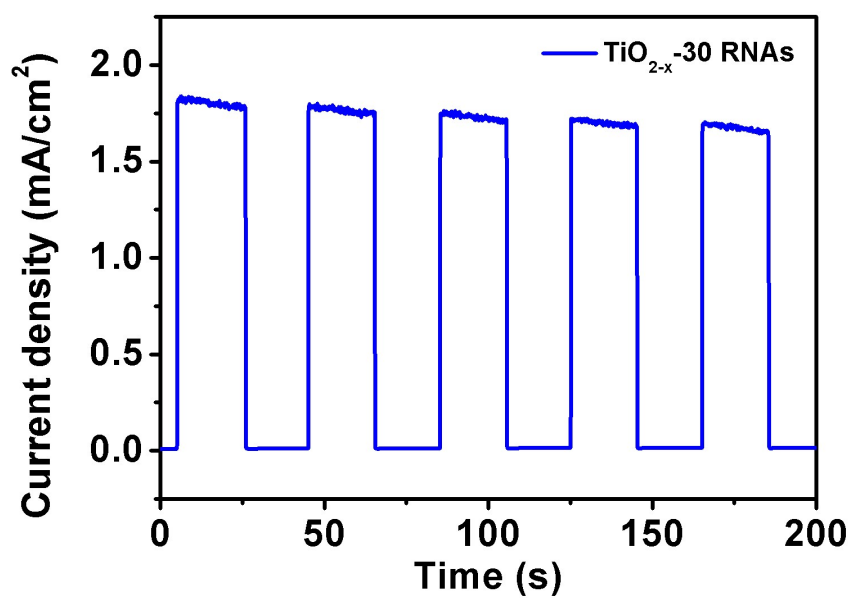

Fig. S4 Photocurrent response measured in Na<sub>2</sub>SO<sub>4</sub> electrolyte with Na<sub>2</sub>S as sacrificial reagent.

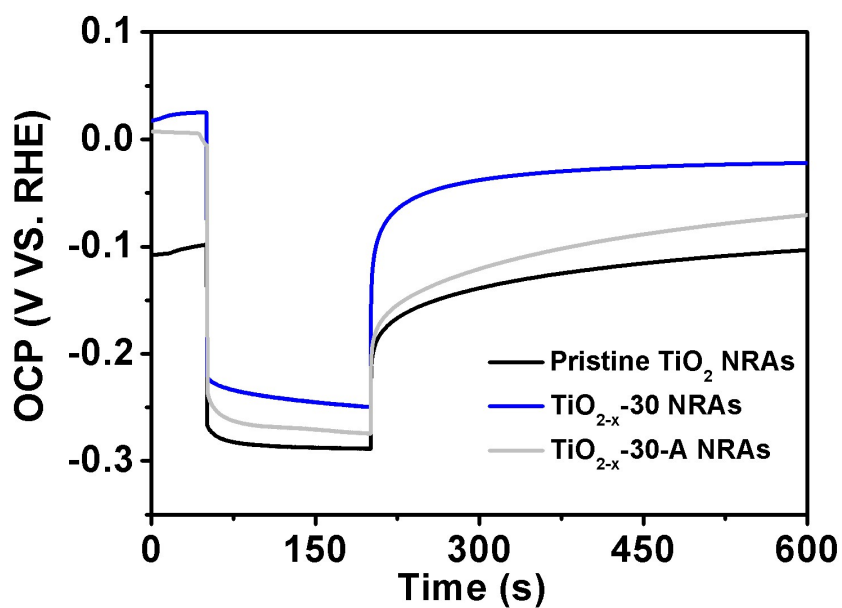

**Fig. S5** Open circuit potential of pristine, TiO<sub>2-x</sub>-30 and TiO<sub>2-x</sub>-30-A NRAs.

The photovoltage of modified electrode (TiO<sub>2-x</sub>-30-A) is larger than that of pristine TiO<sub>2</sub> NRAs. Fig. S5 displays the open-circuit potential of both pristine TiO<sub>2</sub>, TiO<sub>2-x</sub>-30 and TiO<sub>2-x</sub>-30-A NRAs in the dark and light. The difference between the potentials that obtained from the dark and light situations led to the photovoltage. The measured photovoltage of pristine TiO<sub>2</sub> NRAs is 0.18 V, and significantly higher values of 0.21 and 0.26 V are obtained from TiO<sub>2-x</sub>-30 and TiO<sub>2-x</sub>-30-A NRAs, respectively. The improvement of photovoltage is attributed to the enlarged band bending of TiO<sub>2-x</sub>-30-A NRAs after oxygen vacancy generation.
